# Supplementary material for: First-principles model of optimal translation factors stoichiometry
Source: eLife journal article supplement (doi:10.7554/elife.69222), 2021-09-30
Supplement: figures [file elife-69222-figures-v2.pdf]

---

## Figures and figure supplements

First-principles model of optimal translation factors stoichiometry

**Jean-Benoît Lalanne and Gene-Wei Li**

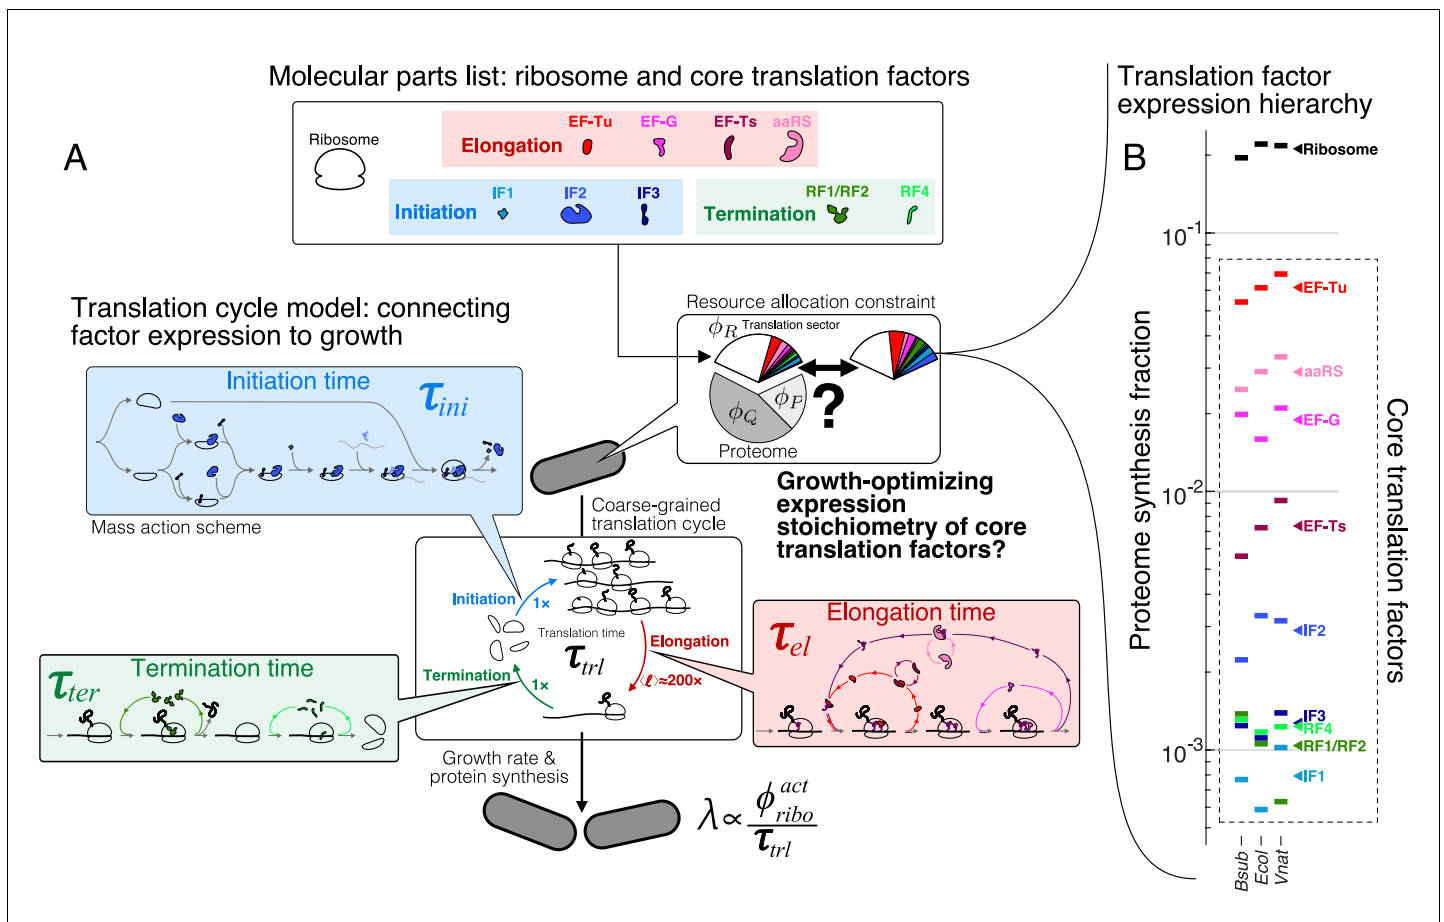

**Figure 1.** The hierarchy of mRNA translation factor expression stoichiometry. **(A)** Multiscale model relating translation factor expression to growth rate. The growth rate  $\lambda$  is directly proportional to the active ribosome content ( $\phi_{ribo}^{act}$ ) in the cell and inversely proportional to the average time to complete the translation cycle  $\tau_{tl}$ , consisting of the sum of the initiation ( $\tau_{ini}$ ), elongation ( $\tau_{el}$ ), and termination ( $\tau_{ter}$ ) times. Each of these reaction times are determined by the translation factor abundances. On average, the elongation step is repeated around  $\langle \ell \rangle \approx 200\times$  to complete a full protein, compared to  $1\times$  for initiation and termination. Our framework of flux optimization under proteome allocation constraint addresses what ribosome and translation factor abundances maximize growth rate. **(B)** Measured expression hierarchy of bacterial mRNA translation factors, conserved across evolution. Horizontal bars mark the proteome synthesis fractions as measured by ribosome profiling (Lalanne et al., 2018) (equal to the proteome fraction by weight for a stable proteome) for key mRNA translation factors in *B. subtilis* (Bsub), *E. coli* (Ecol), and *V. natriegens* (Vnat) and are color-coded according to the protein (or group of proteins) specified. Triangles (▀) on the right indicate the mean synthesis fraction of the protein in the three species. See Table 1 for a short description of the translation factors considered. Synthesis fractions in (B) can be found in Supplementary file 1.

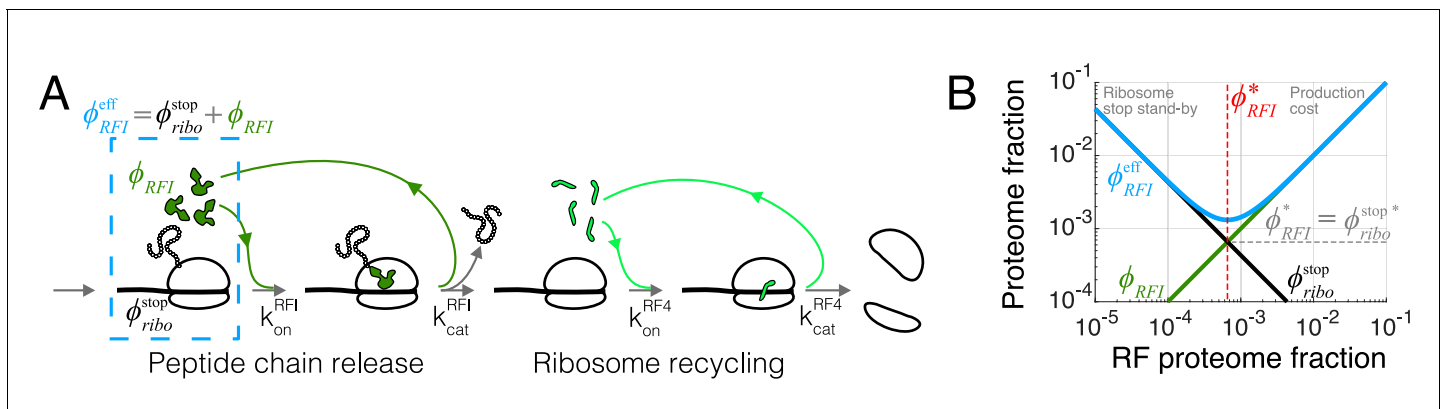

**Figure 2.** Case study with translation termination. (A) Coarse-grained translation termination scheme. (B) Illustration of the minimization of effective proteome fraction corresponding to peptide chain release factors, leading to the equipartition principle.

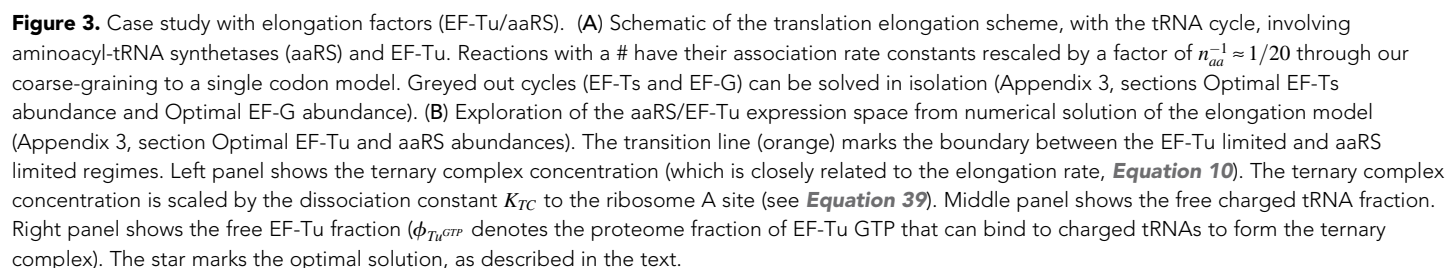

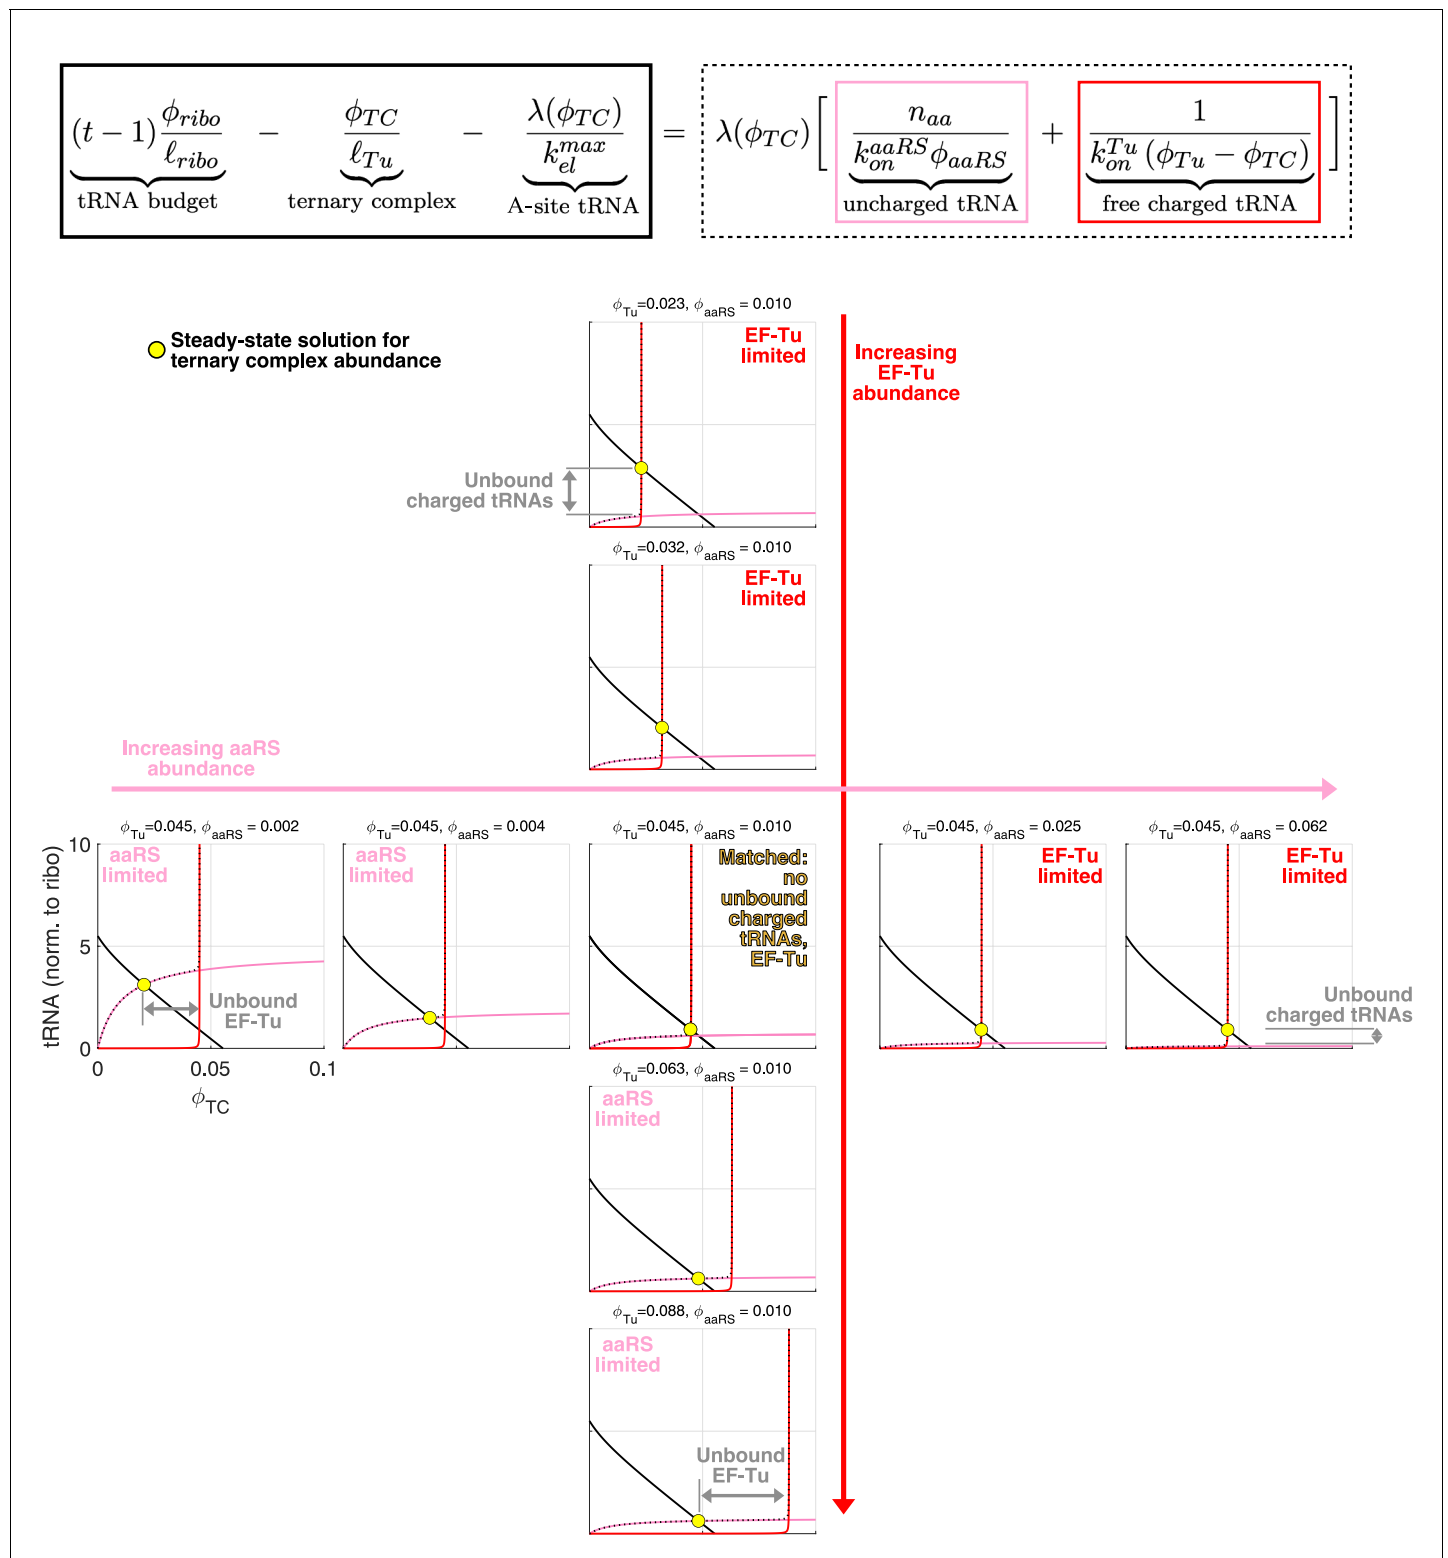

**Figure 3—figure supplement 1.** Geometrical interpretation of the sharpness of the separation of the aaRS limited and EF-Tu limited regimes. Geometrical interpretation of the sharpness of the separation of the aaRS limited and EF-Tu limited regimes. Each graph corresponds to a different combination of aaRS and EF-Tu abundance. The solution for  $\phi_{TC}$  (yellow circle) corresponds to the intersection of the full (tRNA budget minus TC concentration and ribosome bound tRNAs) and dashed (all remaining tRNA contributions) black lines. Red and pink lines correspond to the free uncharged and charged tRNAs respectively. Because of the rapid divergence of the free charged tRNA term (red) at  $\phi_{TC} = \phi_{Tu}$ , the system shifts from

Figure 3—figure supplement 1 continued on next page

*Figure 3—figure supplement 1 continued*

being limited by aaRS-limited (pink line intersecting full black line) to being EF-Tu limited (red line intersect full black line) over a very narrow range in aaRS or EF-Tu expression change. The central graph corresponds to the abundance of EF-Tu and aaRS matched (no unbound charged tRNAs or EF-Tu), and falls on the transition line of **Figure 3**.

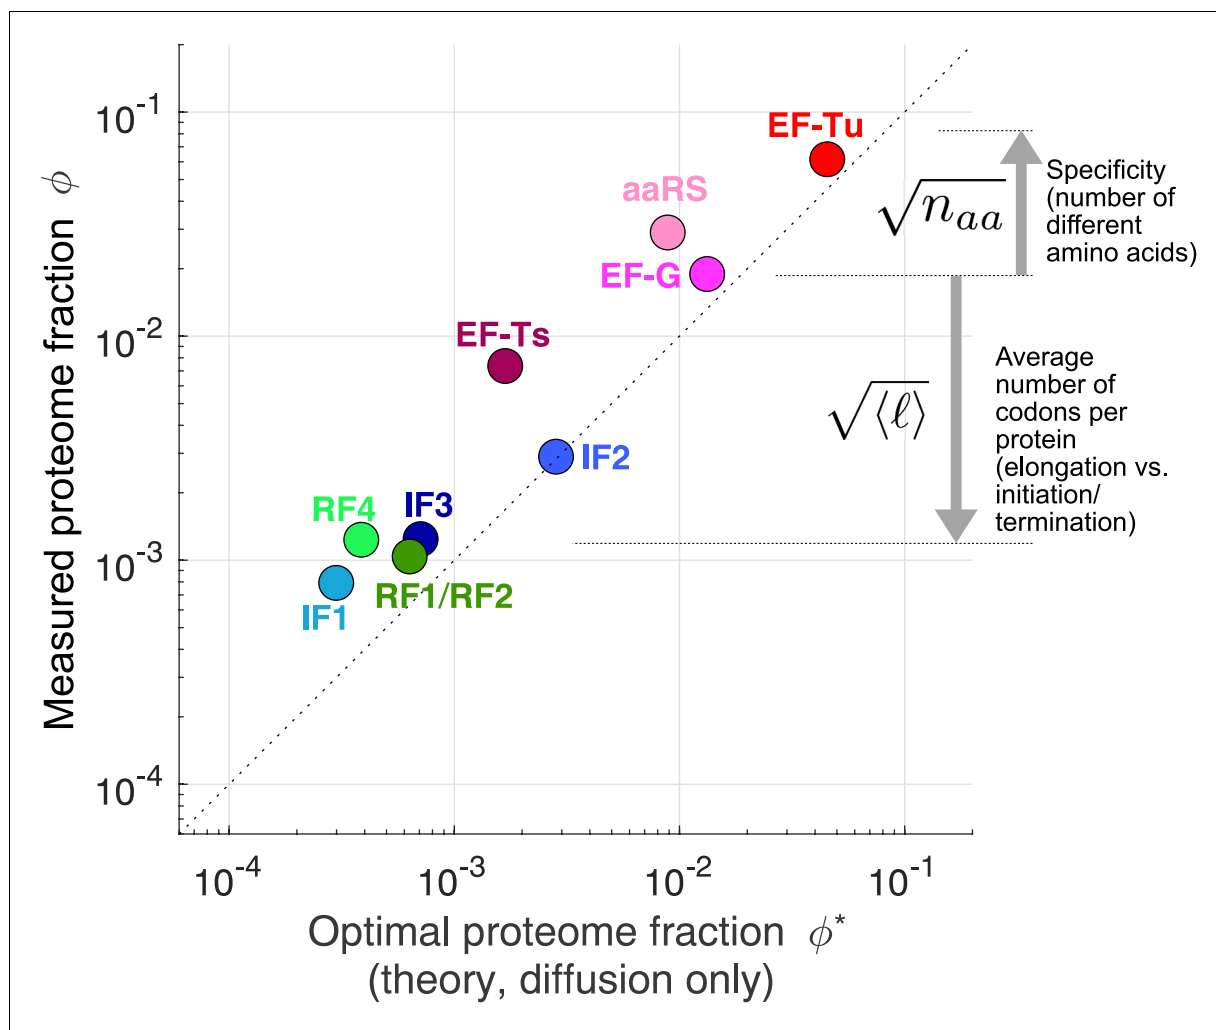

**Figure 4.** Predicted optimal abundance (no catalytic contribution,  $k_{cat} \rightarrow \infty$ ) versus observed abundance. Measured proteome fractions are the average of *E. coli*, *B. subtilis*, *V. natriegens* (Lalanne et al., 2018). We note that given the sensitivity of the optimal aaRS abundance on the total tRNA/ribosome ratio (visually: yellow star's position in Figure 3B moves rapidly along x-axis upon changes in plateau of transition line), the prediction for aaRS should be interpreted with caution. Data and predicted values can be found in **Supplementary file 1** and **2**.

**A**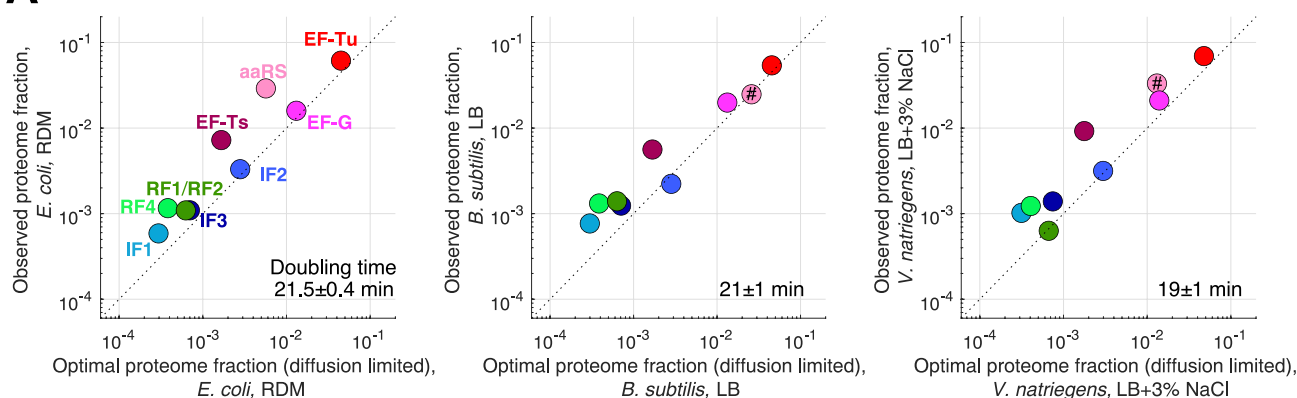**B**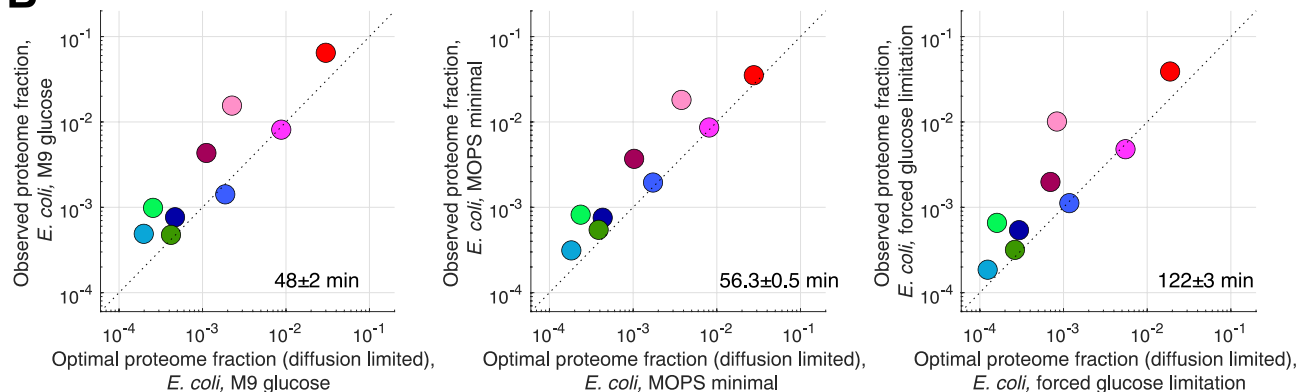**C**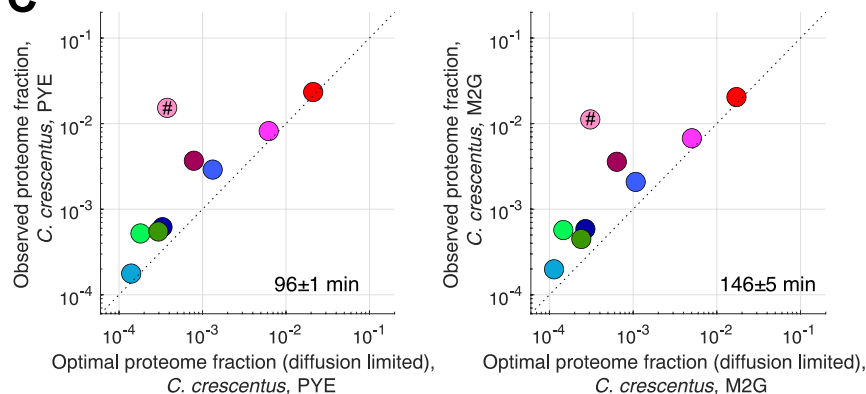

**Figure 4—figure supplement 1.** Measured and predicted proteome fraction for core translation factors in individual conditions. Measured (ribosome profiling) and predicted (diffusion-limited estimates) proteome fraction for core translation factors in individual conditions corresponding to different Figure 4—figure supplement 1 continued on next page



*Figure 4—figure supplement 1 continued*

ribosome profiling datasets included in our analysis (see **Supplementary files 1–4**). Doubling time for each condition is indicated. (A) individual fast growing species (see **Figure 4** for the average). (B) Slower growth conditions in *E. coli*. (C) *C. crescentus* datasets. Predictions of aaRS in species other than *E. coli* are marked by # to indicate that we used *E. coli* tRNA abundance measurements from **Dong et al., 1996** to make prediction for this tIF these other species.

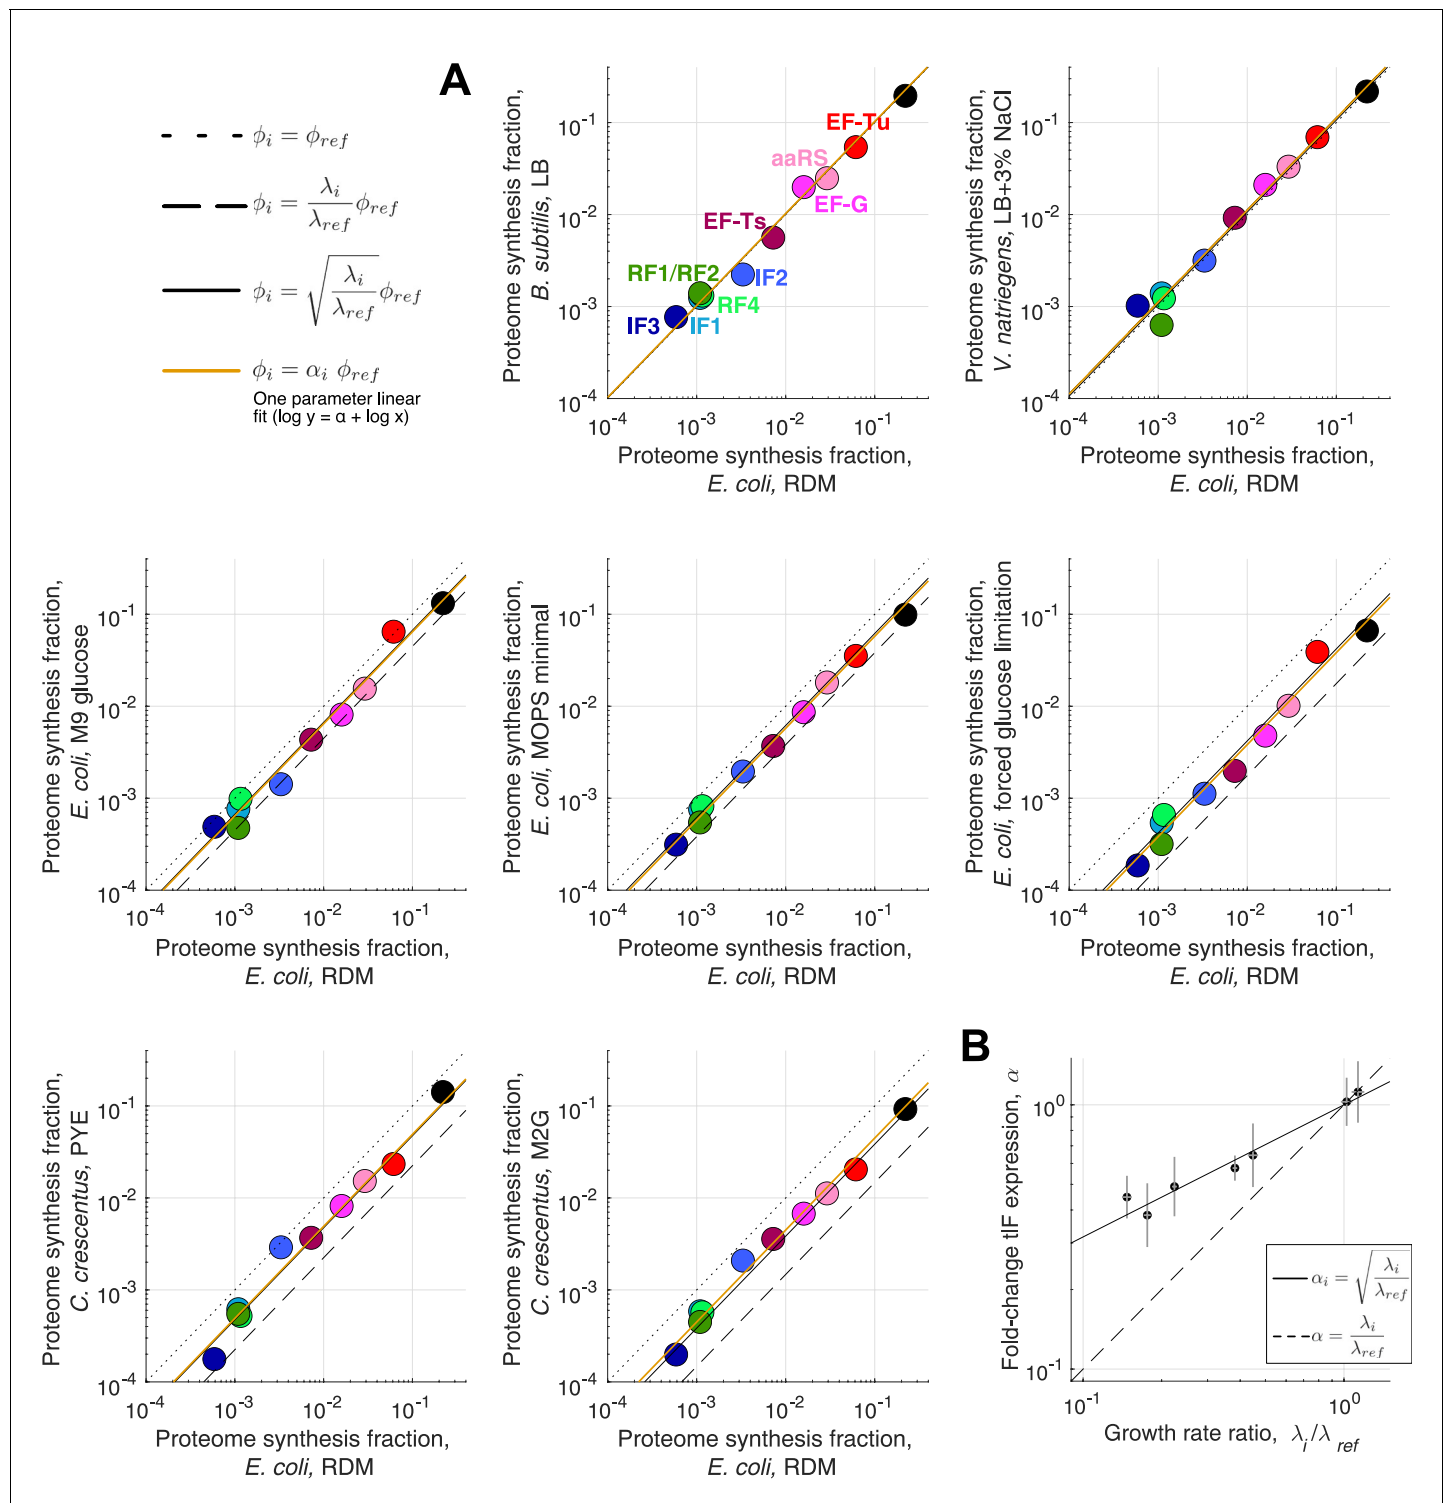

**Figure 4—figure supplement 2.** Expression stoichiometry of core translation factors in different species and at different growth rates. Expression stoichiometry of core translation factors in different species and at different growth rates. (A) Comparison of measured (ribosome profiling) proteome fraction for core translation factors across different species and growth conditions (same conditions as **Figure 4—figure supplement 1**). All conditions are compared to the *E. coli* RDM dataset (reference: *ref*, condition of interest: *i*). Dotted line correspond to  $\phi_i = \phi_{ref}$ , dashed line to  $\phi_i = (\lambda_i/\lambda_{ref})\phi_{ref}$  and full black line to  $\phi_i = \sqrt{\lambda_i/\lambda_{ref}}\phi_{ref}$  (the parameter free prediction from the binding-limited regime of the model, optimal abundance  $\propto \sqrt{\lambda}$ ). Orange line corresponds to the one parameter fit  $\log \phi_i = \alpha_i + \log \phi_{ref}$  (excluding aaRS, not expected to follow the square root scaling, and ribosomes), corresponding to the scaling of all factor's abundance. (B) Best one-parameter fit  $\alpha_i$  (scale factor) from (A) as a function of the growth rate ratio  $\lambda_i/\lambda_{ref}$ . Figure 4—figure supplement 2 continued on next page

Figure 4—figure supplement 2 continued

Square root scaling: full line. Linear scaling: dashed line. Uncertainties on the growth ratio are propagated from uncertainties of the respective growth rates. Uncertainties in  $\alpha_i$  are 95% confidence interval from the linear fits in (A).

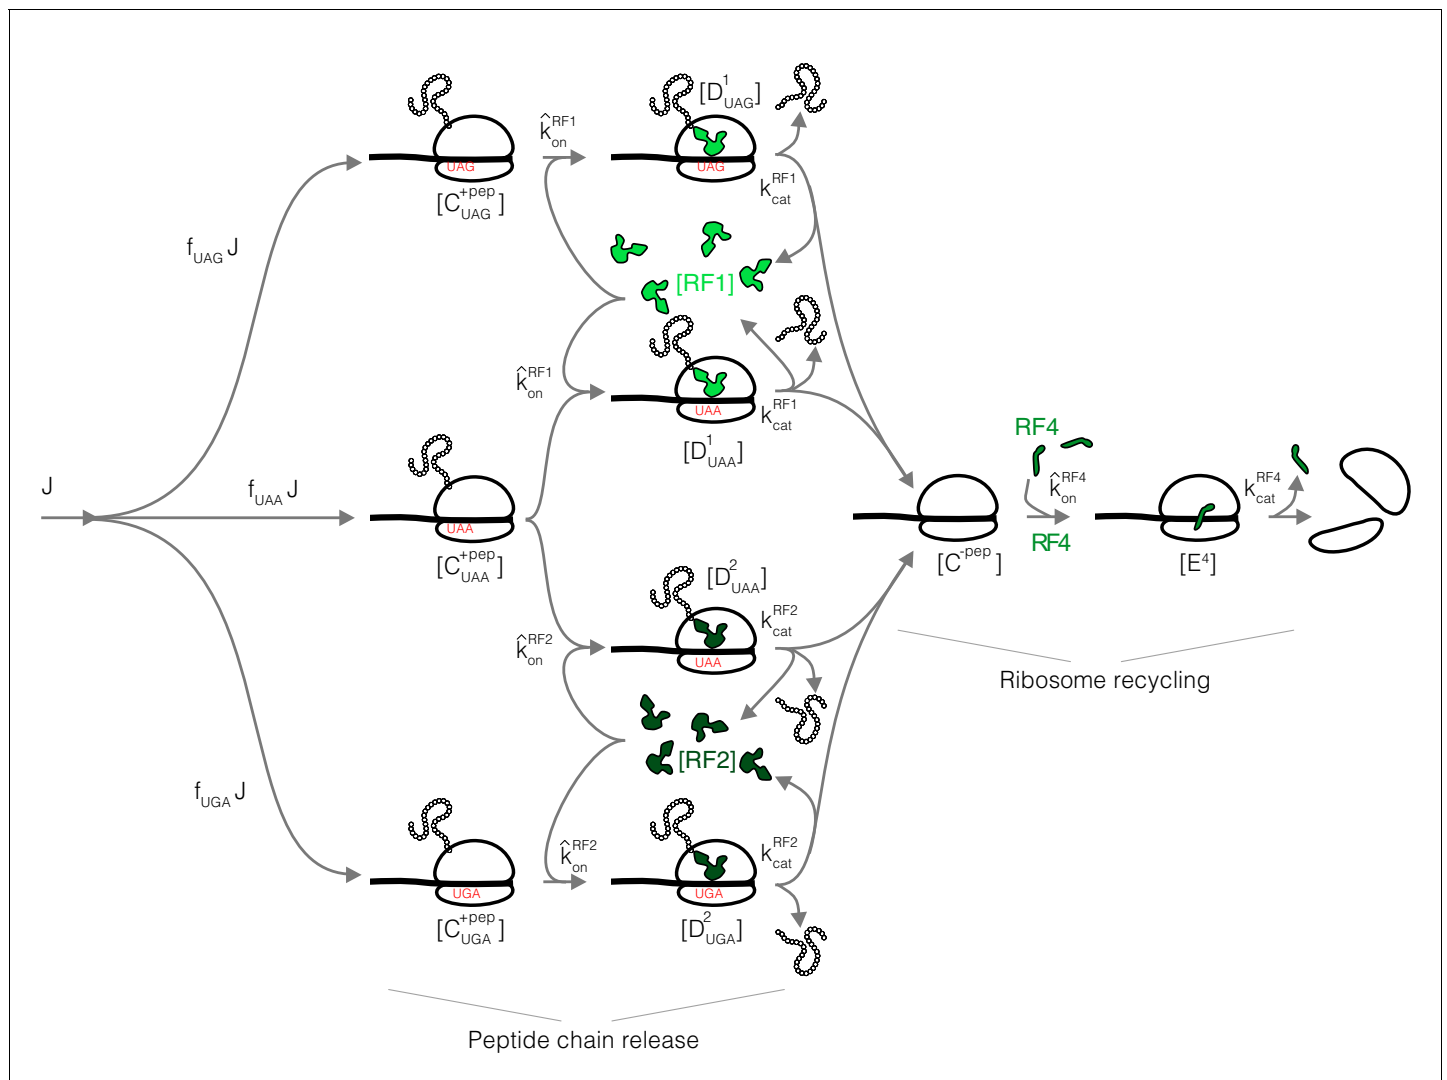

**Appendix 2—figure 1.** Coarse-grained translation termination scheme with three stop codons and RF1/RF2.

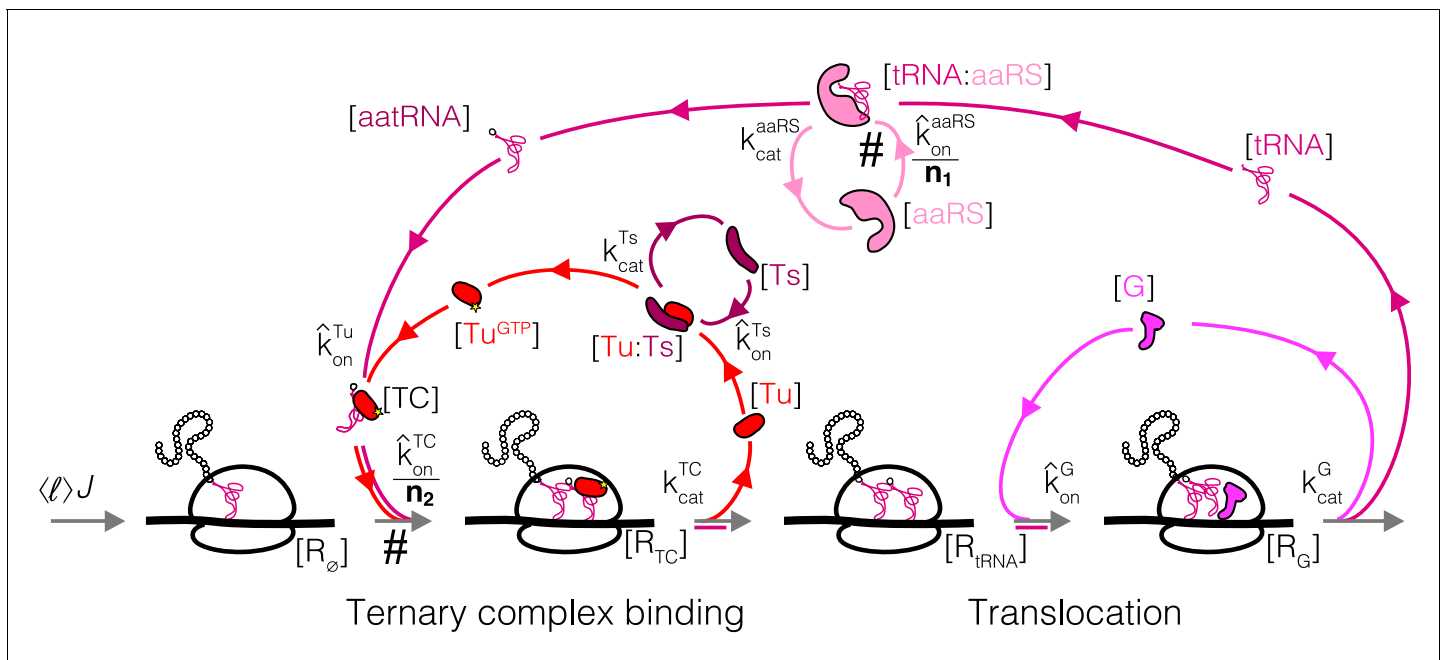

**Appendix 3—figure 1.** Coarse-grained reaction scheme for a single step (amino acid incorporation) of translation elongation. Tu: EF-Tu, Ts: EF-Ts, G: EF-G, aaRS: aminoacyl tRNA synthetases. Steps with slower rates as a result of the coarse-graining to one effective codon are marked by #.

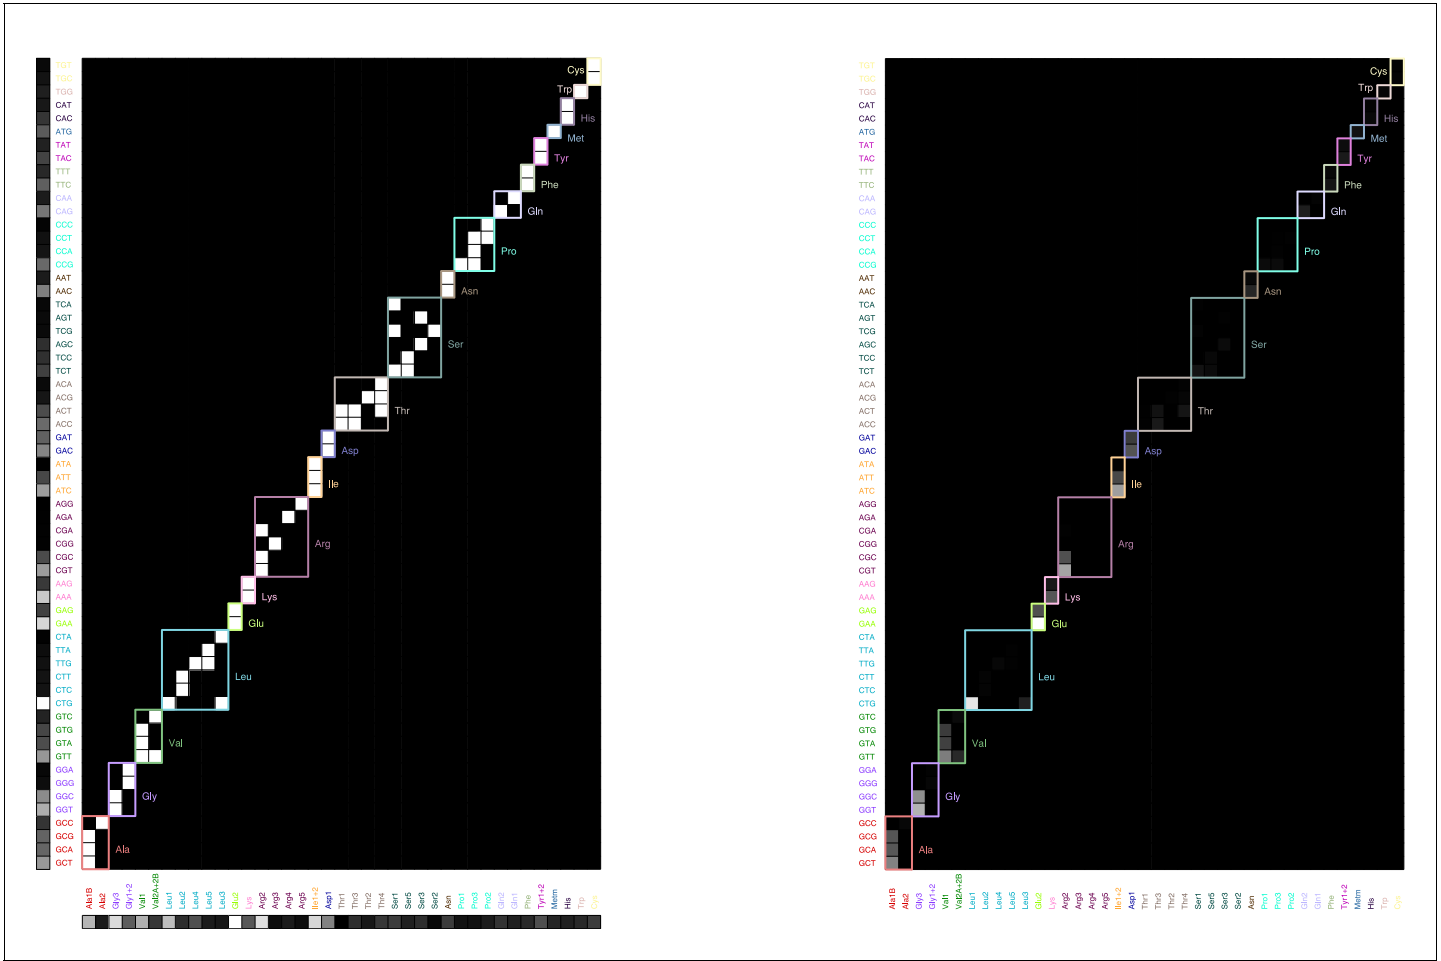

**Appendix 3—figure 2.** Graphical illustration of the sum (*Equation 27*). Left: codon usage (vertical, from analysis of ribosome profiling data from *Li et al., 2014*), tRNA-codon specificity (matrix, from *Björk and Hagervall, 2014*, with different amino acids outlined with different colors), and tRNA abundance (horizontal, from *Dong et al., 1996*) organized by amino acid. Right: product matrix.

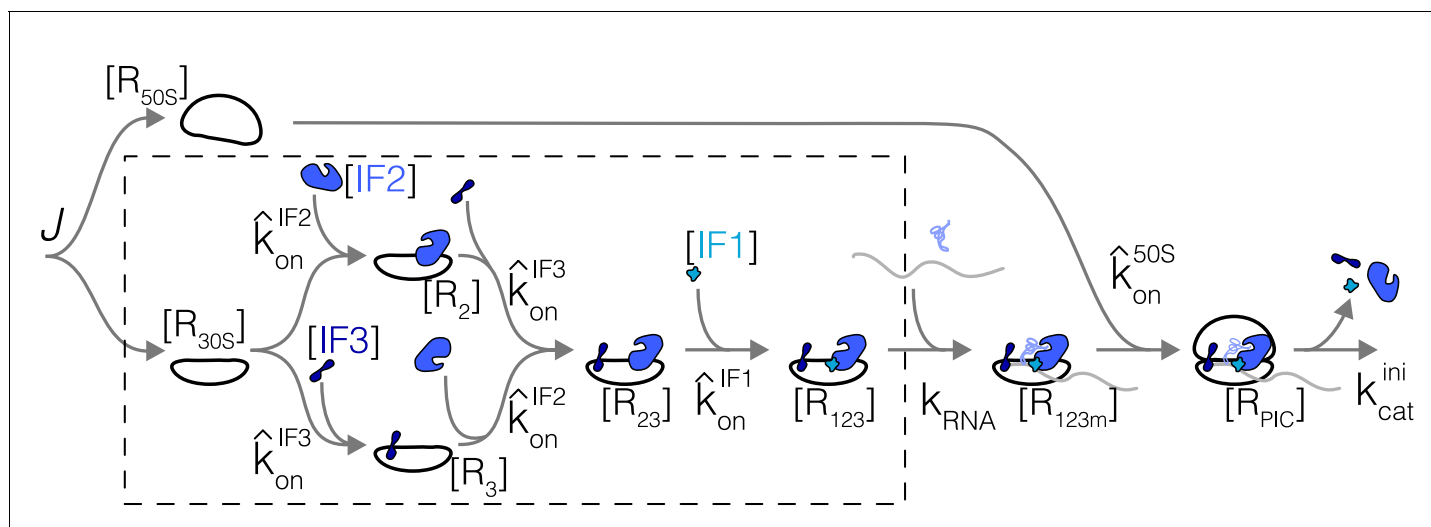

**Appendix 4—figure 1.** Simplified kinetic scheme for translation initiation. Reactions in dashed box correspond to sub-system solved in detail first (section Sub-pathway without subunits joining). Variables are labeled on the scheme.
