# Supplementary material for: First-principles model of optimal translation factors stoichiometry
Source: eLife journal article supplement (doi:10.7554/elife.69222), 2021-09-30
Supplement: supp [file bsub_168_rRNA.xlsx]

## Sheet: Sheet 1
All-Genes	Left-End-Position	Right-End-Position	Transcription-Direction
BSU_RRNA_26	35237	35355	+
BSU_RRNA_4	30279	31832	+
BSU_RRNA_5	32177	35103	+
BSU_RRNA_21	3173818	3173935	-
BSU_RRNA_19	3177086	3178640	-
BSU_RRNA_20	3173991	3176918	-
BSU_RRNA_18	951457	951572	+
BSU_RRNA_22	946696	948250	+
BSU_RRNA_17	948418	951345	+
BSU_RRNA_13	640138	640254	+
BSU_RRNA_30	635433	636987	+
BSU_RRNA_12	637155	640082	+
BSU_RRNA_28	176197	176315	+
BSU_RRNA_25	171498	173049	+
BSU_RRNA_27	173214	176141	+
BSU_RRNA_24	171197	171314	+
BSU_RRNA_16	166500	168053	+
BSU_RRNA_29	168218	171141	+
BSU_RRNA_15	165591	165707	+
BSU_RRNA_23	160893	162445	+
BSU_RRNA_14	162610	165535	+
BSU_RRNA_8	95237	95354	+
BSU_RRNA_6	90536	92089	+
BSU_RRNA_7	92254	95181	+
BSU_RRNA_3	14692	14810	+
BSU_RRNA_1	9810	11364	+
BSU_RRNA_2	11709	14636	+
BSU_RRNA_11	101093	101211	+
BSU_RRNA_9	96392	97945	+
BSU_RRNA_10	98110	101037	+
BSU27350	2794147	2795076	-
