# Supplementary material for: First-principles model of optimal translation factors stoichiometry
Source: eLife journal article supplement (doi:10.7554/elife.69222), 2021-09-30
Supplement: supp [file bsub_168_tRNA.xlsx]

## Sheet: Sheet 1
All-Genes	Left-End-Position	Right-End-Position	Transcription-Direction
BSU_TRNA_9	32020	32095	+
BSU_TRNA_8	31932	32008	+
BSU_TRNA_60	3172968	3173040	-
BSU_TRNA_58	3173138	3173214	-
BSU_TRNA_70	3172070	3172144	-
BSU_TRNA_65	3172512	3172588	-
BSU_TRNA_72	3171879	3171950	-
BSU_TRNA_56	3173324	3173398	-
BSU_TRNA_68	3172247	3172320	-
BSU_TRNA_67	3172331	3172406	-
BSU_TRNA_69	3172155	3172231	-
BSU_TRNA_55	3173404	3173490	-
BSU_TRNA_57	3173224	3173309	-
BSU_TRNA_54	3173501	3173576	-
BSU_TRNA_61	3172872	3172948	-
BSU_TRNA_64	3172600	3172676	-
BSU_TRNA_62	3172793	3172869	-
BSU_TRNA_66	3172424	3172499	-
BSU_TRNA_59	3173046	3173122	-
BSU_TRNA_63	3172694	3172786	-
BSU_TRNA_71	3171976	3172066	-
BSU_TRNA_53	3173614	3173689	-
BSU_TRNA_52	3173722	3173797	-
BSU_TRNA_29	951582	951656	+
BSU_TRNA_34	952042	952118	+
BSU_TRNA_42	952781	952851	+
BSU_TRNA_40	952580	952651	+
BSU_TRNA_31	951788	951859	+
BSU_TRNA_41	952701	952775	+
BSU_TRNA_39	952495	952570	+
BSU_TRNA_43	952859	952947	+
BSU_TRNA_44	953213	953294	+
BSU_TRNA_33	951954	952030	+
BSU_TRNA_35	952131	952206	+
BSU_TRNA_30	951662	951753	+
BSU_TRNA_36	952212	952284	+
BSU_TRNA_38	952397	952470	+
BSU_TRNA_37	952307	952391	+
BSU_TRNA_32	951869	951944	+
BSU_TRNA_79	635110	635186	+
BSU_TRNA_22	640405	640481	+
BSU_TRNA_80	635200	635273	+
BSU_TRNA_21	640268	640344	+
BSU_TRNA_28	166253	166328	+
BSU_TRNA_26	166064	166140	+
BSU_TRNA_23	165754	165825	+
BSU_TRNA_25	165959	166033	+
BSU_TRNA_27	166168	166244	+
BSU_TRNA_24	165830	165902	+
BSU_TRNA_20	96146	96221	+
BSU_TRNA_18	95956	96032	+
BSU_TRNA_16	95772	95846	+
BSU_TRNA_15	95649	95731	+
BSU_TRNA_17	95861	95946	+
BSU_TRNA_14	95567	95642	+
BSU_TRNA_19	96060	96136	+
BSU_TRNA_13	95455	95530	+
BSU_TRNA_12	95375	95450	+
BSU_TRNA_6	11552	11627	+
BSU_TRNA_5	11464	11540	+
BSU_TRNA_81	3545889	3545964	-
BSU_TRNA_45	528704	528778	+
BSU_TRNA_48	528986	529060	+
BSU_TRNA_47	528903	528974	+
BSU_TRNA_50	529174	529255	+
BSU_TRNA_51	529336	529422	+
BSU_TRNA_49	529087	529162	+
BSU_TRNA_46	528783	528873	+
BSU_TRNA_86	3194455	3194527	-
BSU_TRNA_85	2003276	2003348	-
BSU_TRNA_84	2899816	2899889	-
BSU_TRNA_73	2563889	2563959	+
BSU_TRNA_74	194547	194621	+
BSU_TRNA_11	70267	70338	+
BSU_TRNA_75	194205	194279	+
BSU_TRNA_82	967065	967138	+
BSU_TRNA_10	70181	70257	+
BSU_TRNA_7	22292	22384	+
BSU_TRNA_76	194363	194435	+
BSU_TRNA_77	194458	194542	+
BSU_TRNA_78	194283	194358	+
BSU_TRNA_83	1262789	1262861	+
BSU_TRNA_2	4154895	4154971	-
BSU_TRNA_3	4155053	4155124	-
BSU_TRNA_4	4155134	4155209	-
BSU_TRNA_1	4154787	4154859	-
