# Supplementary material for: First-principles model of optimal translation factors stoichiometry
Source: eLife journal article supplement (doi:10.7554/elife.69222), 2021-09-30

$$(t-1) \frac{\phi_{ribo}}{\ell_{ribo}} - \frac{\phi_{TC}}{\ell_{Tu}} - \frac{\lambda(\phi_{TC})}{k_{el}^{max}} = \lambda(\phi_{TC}) \left[ \frac{n_{aa}}{k_{on}^{aaRS} \phi_{aaRS}} + \frac{1}{k_{on}^{Tu} (\phi_{Tu} - \phi_{TC})} \right]$$

tRNA budget
ternary complex
A-site tRNA

$\frac{n_{aa}}{k_{on}^{aaRS} \phi_{aaRS}}$ 
uncharged tRNA

$\frac{1}{k_{on}^{Tu} (\phi_{Tu} - \phi_{TC})}$ 
free charged tRNA

Steady-state solution for ternary complex abundance

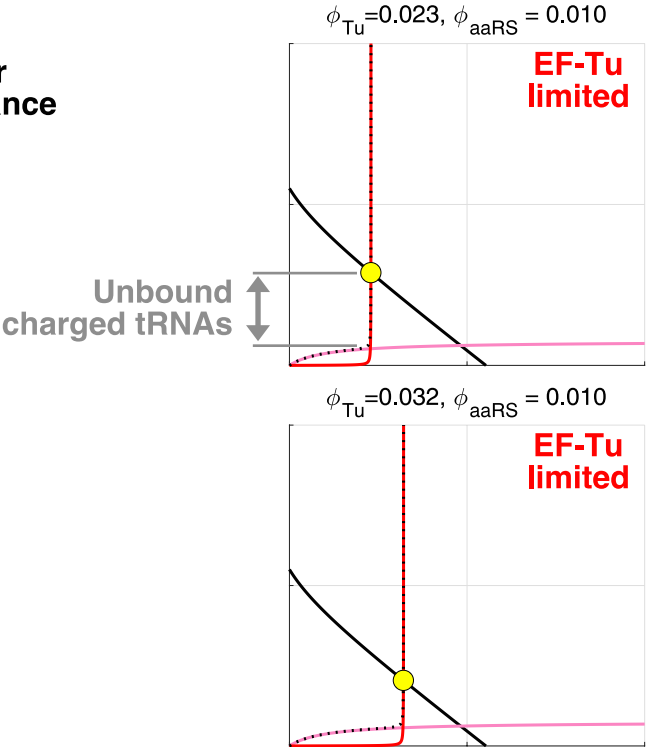

Increasing aaRS abundance

Increasing EF-Tu abundance

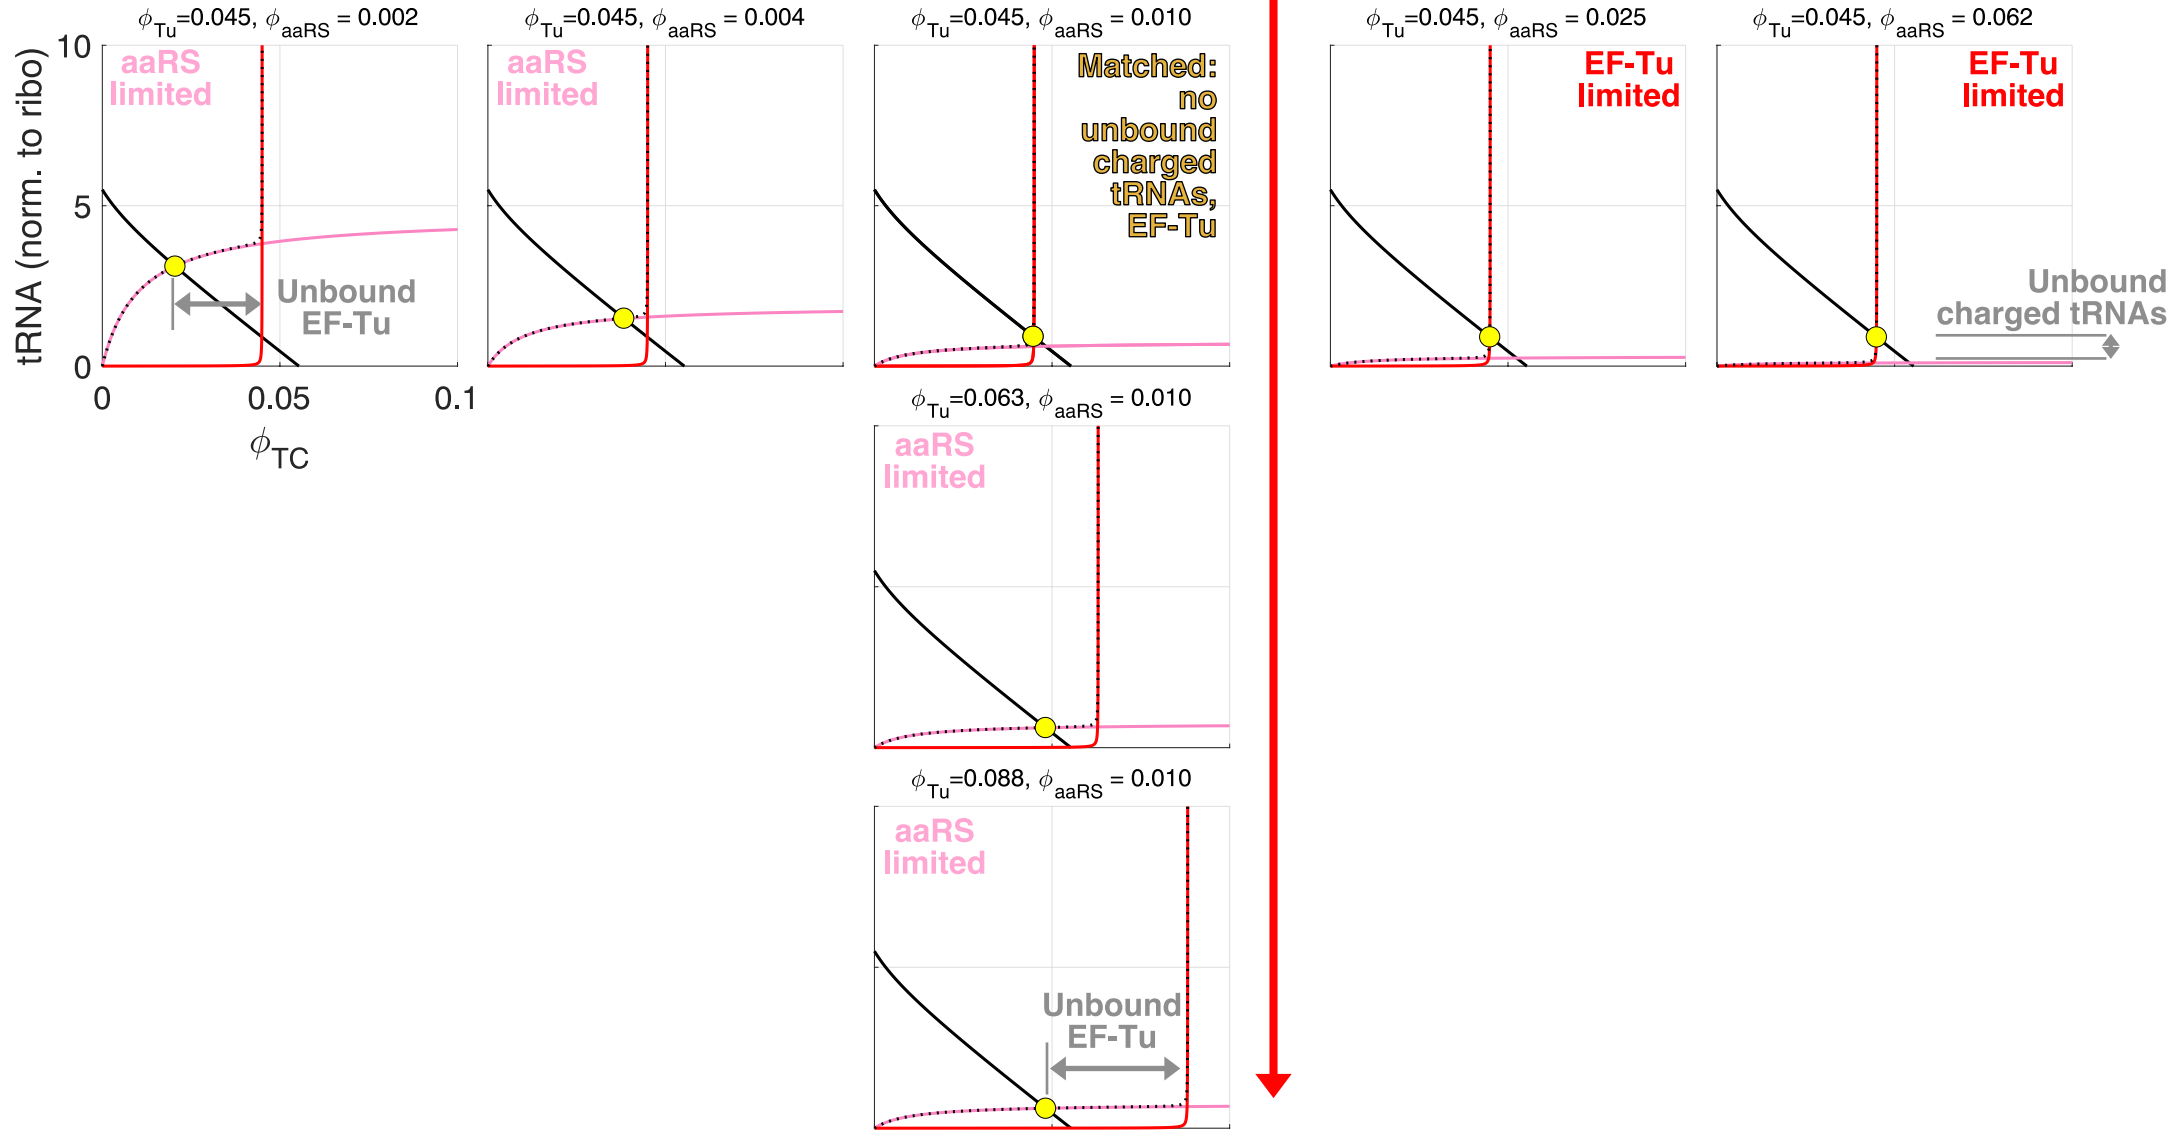

Supplement: supp [file elife-69222-supp-v1.zip]
