# Supplementary material for: First-principles model of optimal translation factors stoichiometry
Source: eLife journal article supplement (doi:10.7554/elife.69222), 2021-09-30
Supplement: supp [file elife-69222-supp-v1.zip]

Archive with 9 entries (9 files):
- elife_poa_e69222_Transparent_Reporting_File.pdf
- elife_poa_e69222_Figure_3_source_code_1.zip
- elife_poa_e69222_Figure_3_figure_supplement_1.pdf
- elife_poa_e69222_Figure_4_figure_supplement_1.pdf
- elife_poa_e69222_Figure_4_figure_supplement_2.pdf
- elife_poa_e69222_Supplementary_file_1.xlsx
- elife_poa_e69222_Supplementary_file_2.xlsx
- elife_poa_e69222_Supplementary_file_3.xlsx
- elife_poa_e69222_Supplementary_File_4.xlsx
