# Supplementary material for: First-principles model of optimal translation factors stoichiometry
Source: eLife journal article supplement (doi:10.7554/elife.69222), 2021-09-30
Supplement: supp [file elife-69222-supp-v1.zip › elife_poa_e69222_Supplementary_file_1.xlsx]

## Sheet: Sheet1
Proteome synthesis fraction (in %) of core mRNA translation factors for species and growth conditions with fast growth estimated from ribosome profiling data (Li et al, 2014; Lalanne et al, 2018). *:RDM, rich defined medium (MOPS complete) (Neidhardt et al 1974).
Species	E. coli	B. subtilis	V. natriegens	Average
Strain	K-12 MG1655	subsp. str. 168	NBRC 15636	N/A
Doubling time (min)	21.5±0.4	21±1	19±1	21±1
Growth condition	RDM*, 37C	LB, 37C	RDM+3% NaCl, 37C	N/A
Ribosome	22.07	19.53	21.77	21.12
EF-Tu	6.14	5.4	6.93	6.16
aaRS	2.91	2.48	3.32	2.9
EF-G	1.59	1.99	2.1	1.89
EF-Ts	0.72	0.56	0.92	0.74
IF2	0.33	0.22	0.32	0.29
IF3	0.11	0.12	0.14	0.12
IF1	0.059	0.077	0.102	0.079
RF4	0.116	0.132	0.123	0.123
RF1/RF2	0.109	0.139	0.063	0.104
