# Supplementary material for: First-principles model of optimal translation factors stoichiometry
Source: eLife journal article supplement (doi:10.7554/elife.69222), 2021-09-30
Supplement: supp [file elife-69222-supp-v1.zip › elife_poa_e69222_Supplementary_file_2.xlsx]

## Sheet: Sheet1
Diffusion-limited optimum predicted for translation factors for conditions in Supplementary File 1. *:the Average column is shown in Figure 4. The average is not calculated as the average prediction for individual factors across the three species, but using the average growth rate. tRNA to ribosome ratios in the different conditions are taken from values in E. coli from Dong et al, 1996 at the co…
Species	E. coli	B. subtilis	V. natriegens	Average*
Strain	K-12 MG1655	subsp. str. 168	NBRC 15636	N/A
Doubling time (min)	21.5±0.4	21±1	19±1	21±1
tRNA/ribosome ratio (Dong et al, 1996)	6.5±0.5	6.5±0.5	6.5±0.5	6.5±0.5
Growth condition	RDM, 37C	LB, 37C	RDM + 3% NaCl, 37C	N/A
EF-Tu	4.48	4.53	4.76	4.53
aaRS	0.57	2.59	1.31	0.89
EF-G	1.31	1.33	1.4	1.33
EF-Ts	0.17	0.17	0.18	0.17
IF2	0.28	0.28	0.3	0.28
IF3	0.07	0.071	0.075	0.071
IF1	0.03	0.03	0.031	0.03
RF4	0.038	0.039	0.041	0.039
RF1/RF2	0.063	0.063	0.067	0.063
