# Supplementary material for: First-principles model of optimal translation factors stoichiometry
Source: eLife journal article supplement (doi:10.7554/elife.69222), 2021-09-30
Supplement: supp [file elife-69222-supp-v1.zip › elife_poa_e69222_Supplementary_file_3.xlsx]

## Sheet: Sheet1
Proteome synthesis fraction (in %) of core mRNA translation factors for species/conditions with slower growth estimated from ribosome profiling. *: strain with titratable glucose intake. #: includes 40 μM 3-MBA inducer. Ribosome profiling data in E. coli (Li et al, 2014) (MOPS minimal) and (Mori et al, 2021) (M9 glucose), and from C. crescentus (Schrader et al, 2014; with synthesis rates estimate…
Species	E. coli	E. coli	E. coli	C. crescentus	C. crescentus
Strain	NCM3722	K-12 MG1655	NQ1390*	NA1000	NA1000
Doubling time (min)	48±2	56.3±0.5	122±3	96±1	146±5
Growth condition	M9 gluc., 37C	MOPS min., 37C	M9 gluc.#, 37C	PYE, 28C	M2G, 28C
Ribosome	13.19	9.89	6.66	14.16	9.25
EF-Tu	6.46	3.53	3.9	2.34	2.04
aaRS	1.55	1.81	1.01	1.53	1.12
EF-G	0.81	0.86	0.48	0.82	0.67
EF-Ts	0.43	0.37	0.2	0.37	0.36
IF2	0.14	0.2	0.11	0.29	0.21
IF3	0.077	0.075	0.054	0.062	0.059
IF1	0.049	0.031	0.019	0.018	0.02
RF4	0.099	0.082	0.066	0.052	0.057
RF1/RF2	0.048	0.055	0.032	0.055	0.045
