# Supplementary material for: First-principles model of optimal translation factors stoichiometry
Source: eLife journal article supplement (doi:10.7554/elife.69222), 2021-09-30
Supplement: supp [file elife-69222-supp-v1.zip › elife_poa_e69222_Supplementary_File_4.xlsx]

## Sheet: Sheet1
Diffusion-limited optimum predicted for translation factors for conditions in Supplementary File 3. tRNA to ribosome ratios in the different conditions are taken from values in E. coli from Dong et al, 1996 at the corresponding growth rate. See Figure 4-Figure supplement 1.
Species	E. coli	E. coli	E. coli	C. crescentus	C. crescentus
Strain	NCM3722	K-12 MG1655	NQ1390	NA1000	NA1000
Doubling time (min)	48±2	56.3±0.5	122±3	96±1	146±5
tRNA/ribosome ratio (Dong et al, 1996)	7.5±1	7.5±1	10.5±1	9±1	11±1
Growth condition	M9 gluc., 37C	MOPS min., 37C	M9 gluc., 37C	PYE, 28C	M2G, 28C
EF-Tu	3	2.77	1.88	2.12	1.72
aaRS	0.225	0.378	0.083	0.038	0.031
EF-G	0.88	0.81	0.55	0.62	0.5
EF-Ts	0.111	0.103	0.07	0.079	0.064
IF2	0.187	0.173	0.117	0.132	0.107
IF3	0.047	0.043	0.029	0.033	0.027
IF1	0.02	0.018	0.012	0.014	0.011
RF4	0.026	0.024	0.016	0.018	0.015
RF1/RF2	0.042	0.039	0.026	0.03	0.024
