# Supplementary figures and images for: First-principles model of optimal translation factors stoichiometry
Source: eLife journal article supplement (doi:10.7554/elife.69222), 2021-09-30

**A**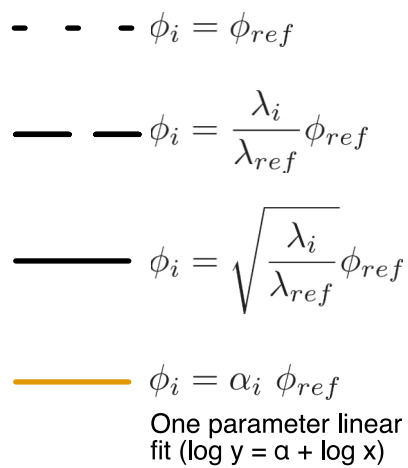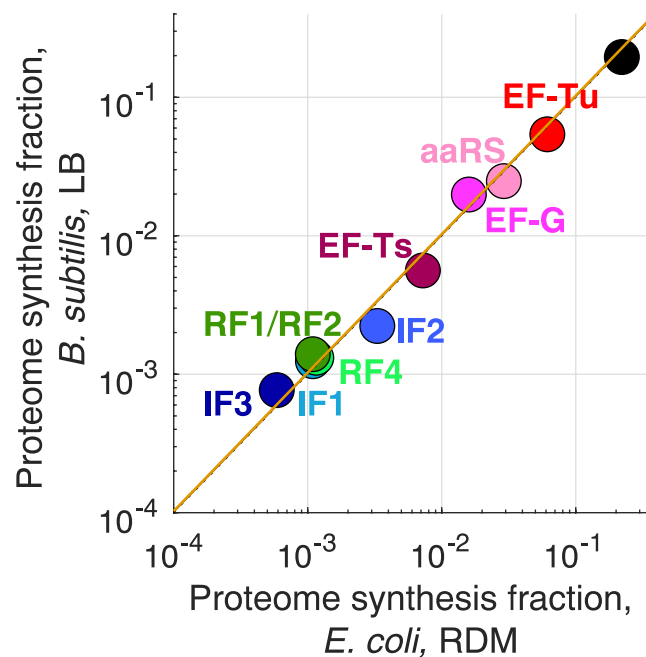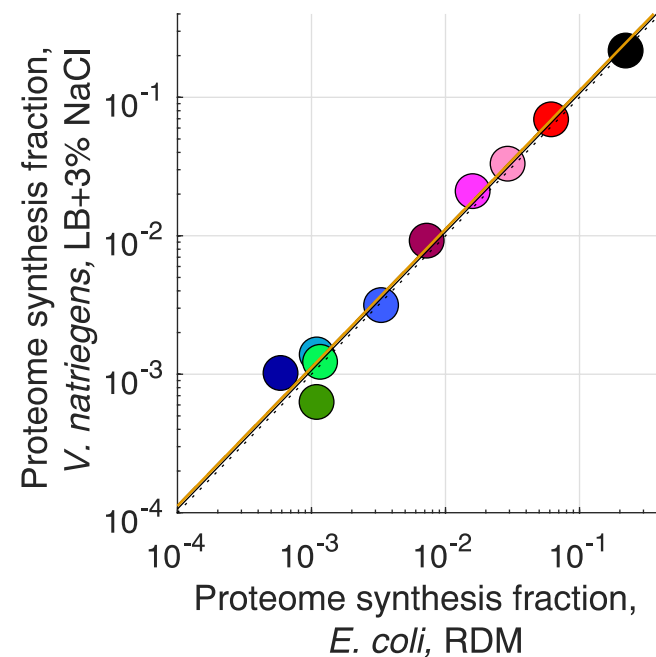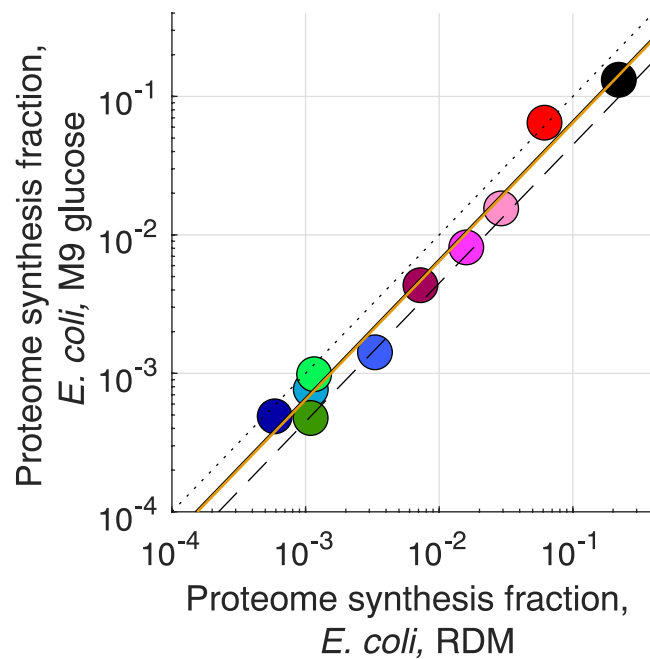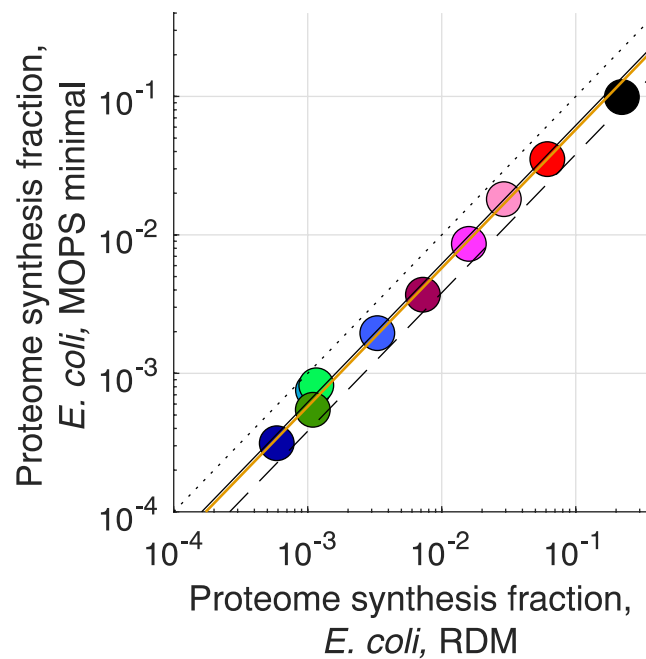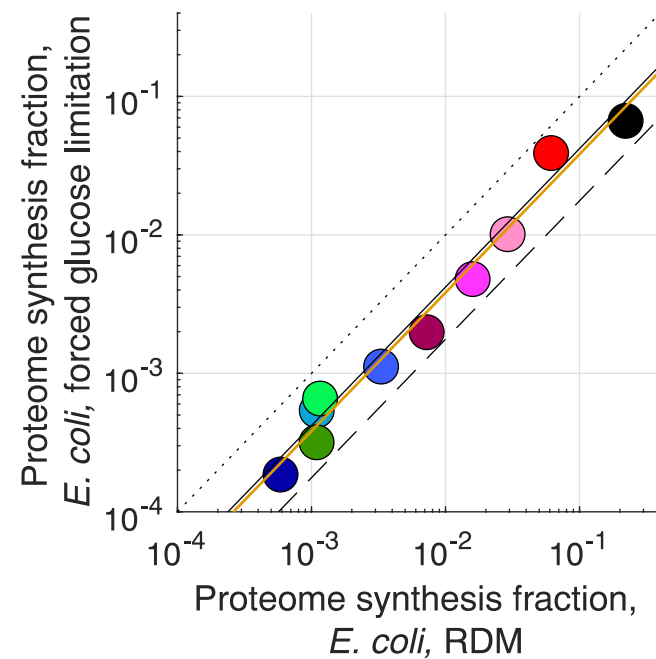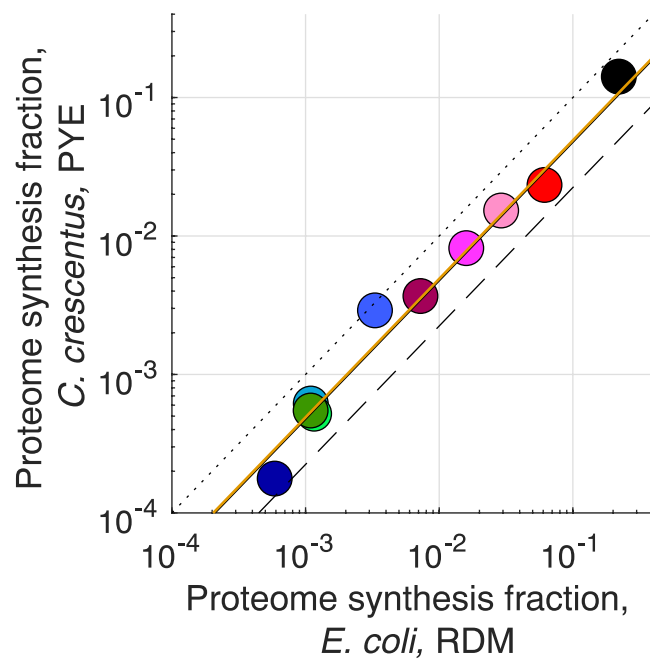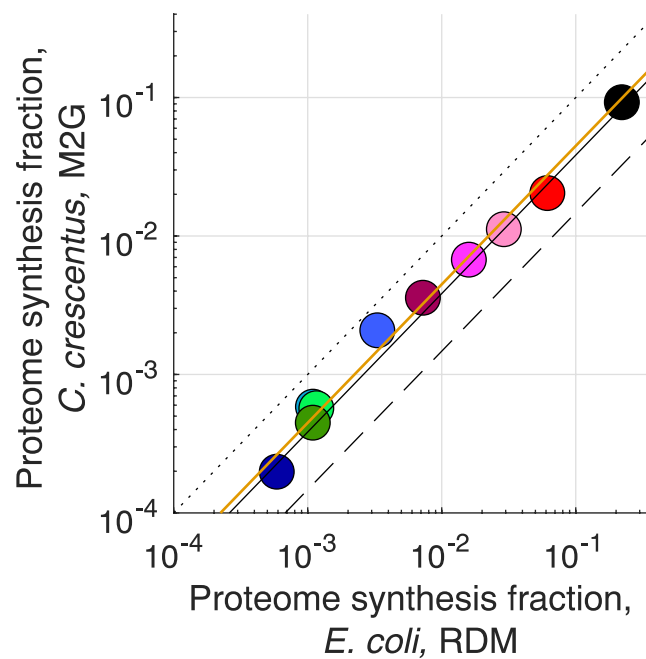**B**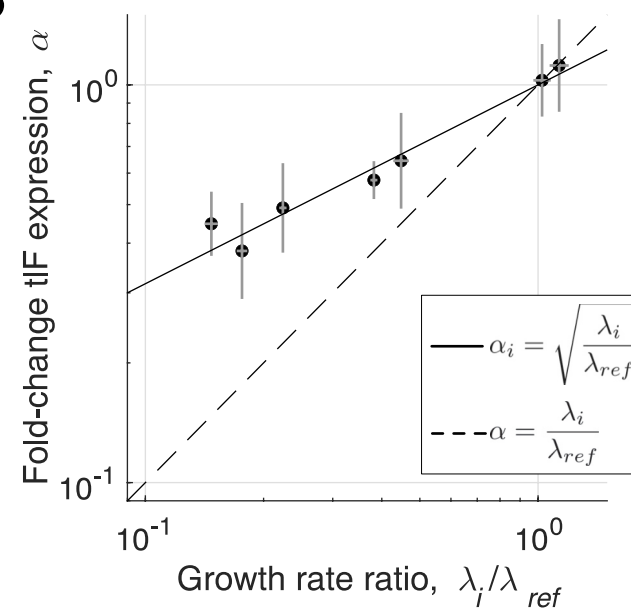

Supplement: supp [file elife-69222-supp-v1.zip]

**A**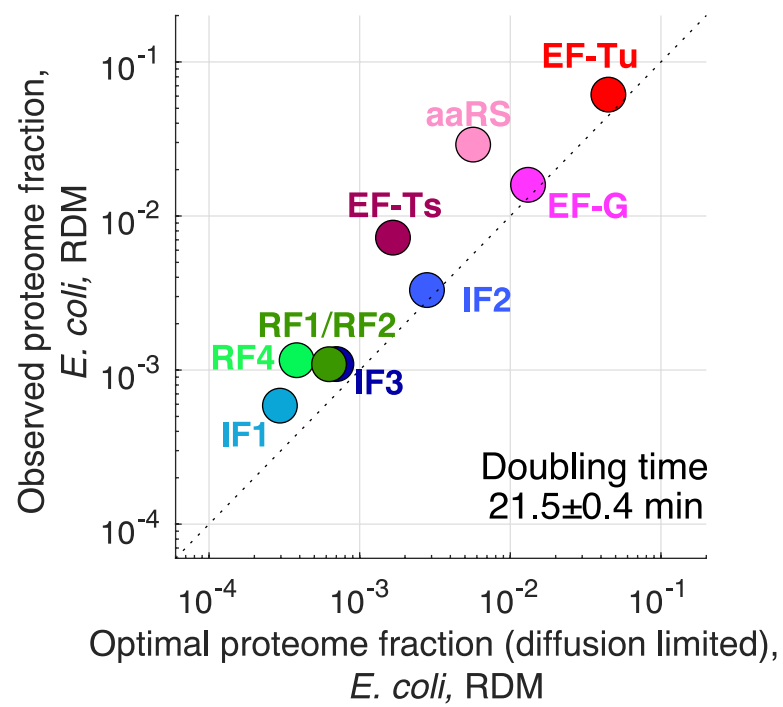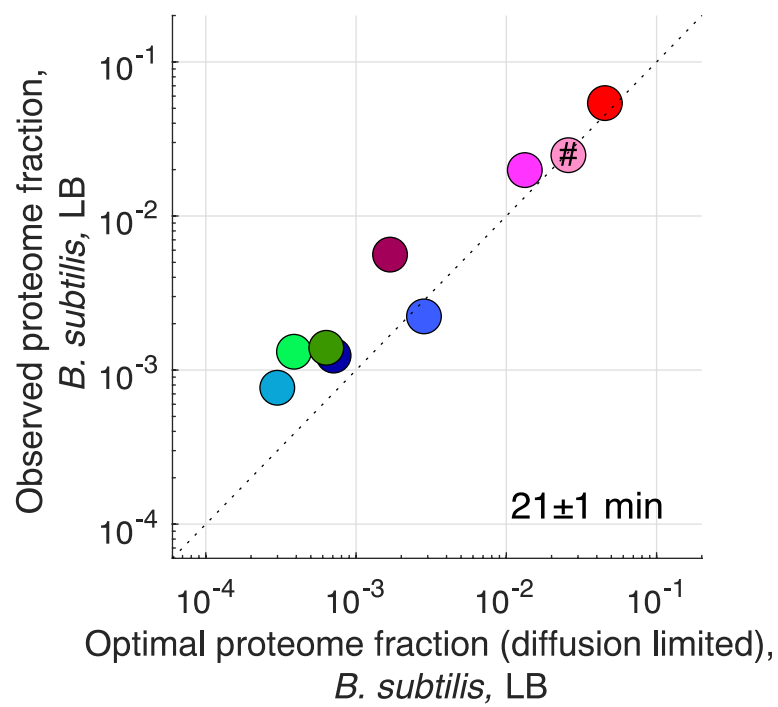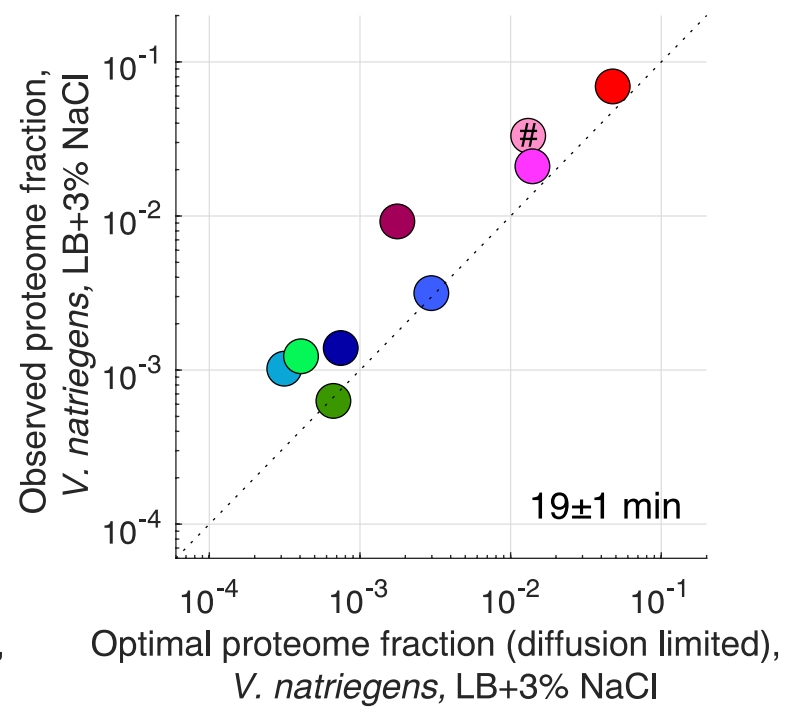**B**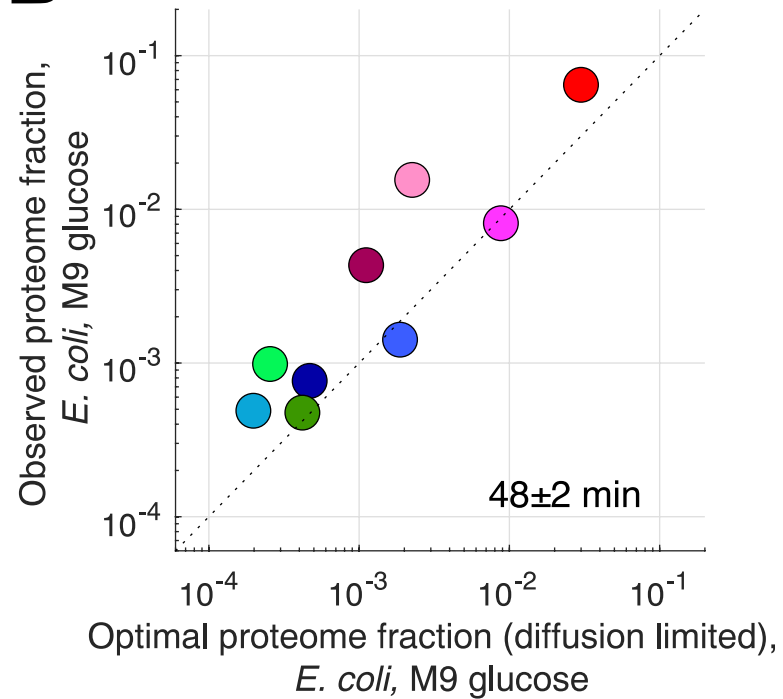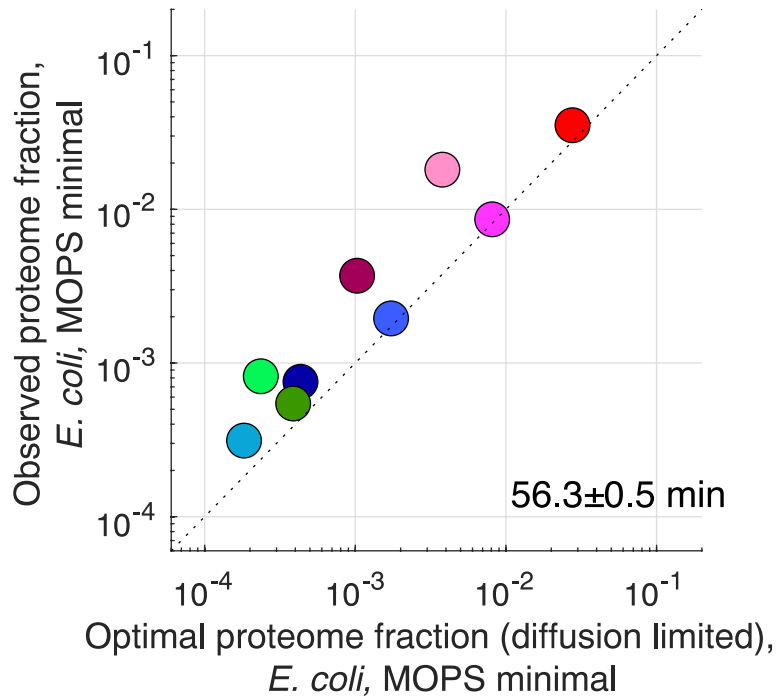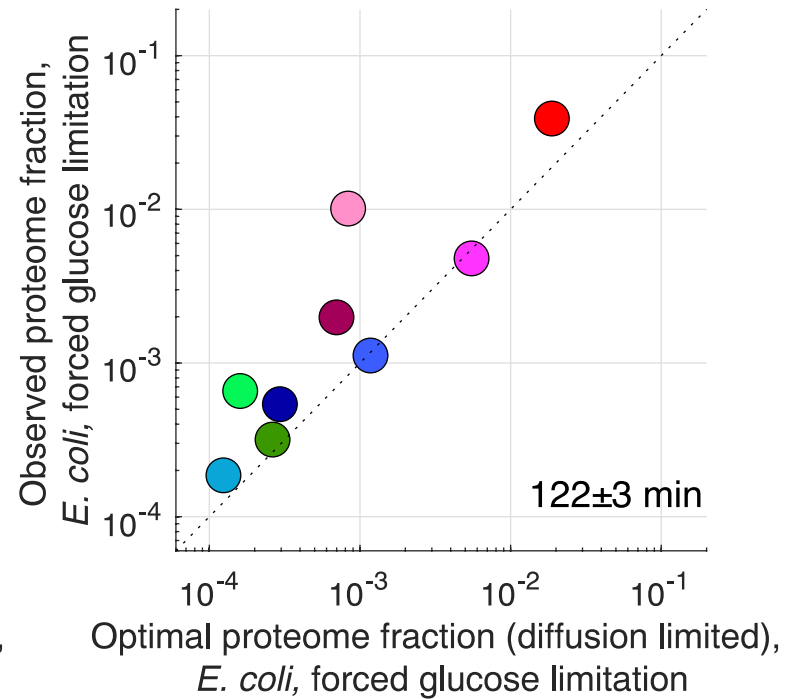**C**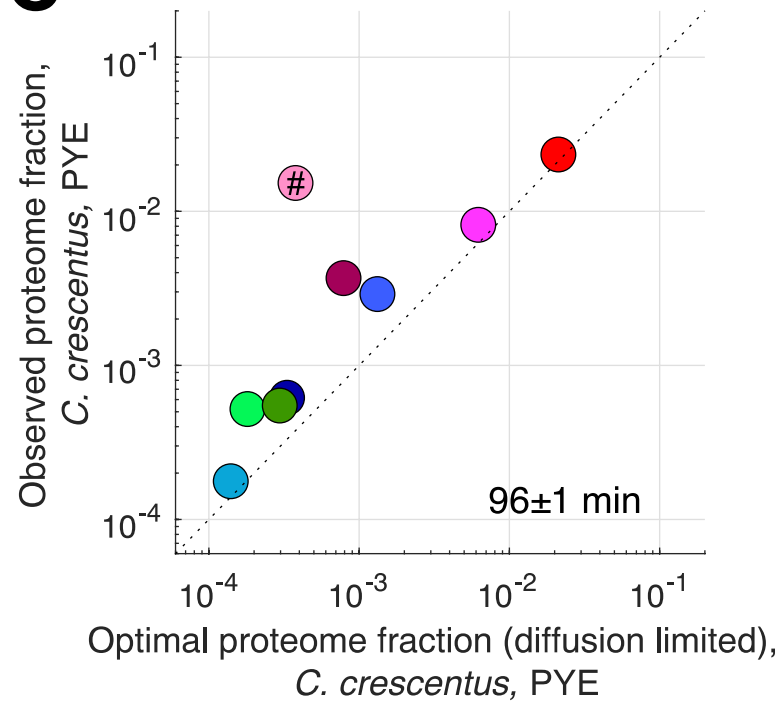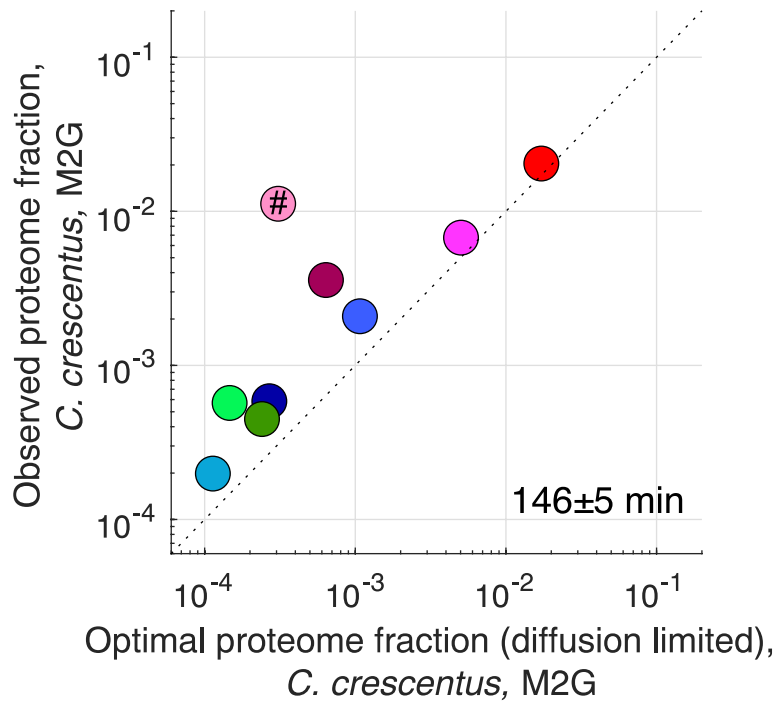

Supplement: supp [file elife-69222-supp-v1.zip › elife_poa_e69222_Figure_4_figure_supplement_1.pdf]
